# Supplementary material for: A theoretical analysis of the fundamental stepwise six-electron oxidation of porphyrinogen to porphyrins: the energetics of porphodimethene and artificial porphyrin intermediates †
Source: Royal Society of Chemistry journal article supplement (doi:10.1039/b100044f), 2001-01-01
Supplement: b100044f-t2.pdf [file b100044f-t2.pdf]

Table 2: Selected angles ( $^{\circ}$ ) for the complex  $[\text{Et}_8\text{N}_4(\Delta)\text{Ni}]$ , experimentally synthesized, and the corresponding model system  $[\text{H}_8\text{N}_4(\Delta)\text{Ni}](\mathbf{6a})$ . For the numbering of the atoms, see Scheme 1.

| Parameter                                                                          | Calculated | Experimental | Parameter   | Calculated | Experimental |
|------------------------------------------------------------------------------------|------------|--------------|-------------|------------|--------------|
| N3-Ni-N4                                                                           | 84.1       | 84.1         | Ni-N4-C19   | 126.0      | 129.9        |
| N2-Ni-N4                                                                           | 171.2      | 173.9        | Ni-N4-C16   | 118.2      | 118.7        |
| N2-Ni-N3                                                                           | 91.3       | 90.5         | C16-N4-C19  | 107.7      | 107.3        |
| N1-Ni-N4                                                                           | 91.3       | 91.1         | N1-C1-C20   | 124.0      | 125.1        |
| N1-Ni-N3                                                                           | 171.2      | 173.6        | N1-C1-C2    | 108.6      | 108.5        |
| N1-Ni-N2                                                                           | 92.3       | 94.1         | C2-C1-C20   | 127.1      | 126.3        |
| Ni-N1-C4                                                                           | 125.7      | 125.0        | N1-C4-C3    | 108.8      | 107.7        |
| Ni-N1-C1                                                                           | 125.6      | 126.7        | C3-C4-C5    | 130.6      | 131.0        |
| C1-N1-C4                                                                           | 108.5      | 108.1        | N1-C4-C5    | 120.5      | 120.4        |
| Ni-N2-C9                                                                           | 125.6      | 126.3        | C4-C5-C6    | 112.0      | 109.6        |
| Ni-N2-C6                                                                           | 125.7      | 125.2        | N2-C6-C5    | 120.5      | 120.5        |
| C6-N2-C9                                                                           | 108.5      | 108.5        | C5-C6-C7    | 130.6      | 130.7        |
| Ni-N3-C14                                                                          | 118.2      | 118.1        | N2-C6-C7    | 108.8      | 108.6        |
| Ni-N3-C11                                                                          | 126.0      | 128.9        | N2-C9-C8    | 108.6      | 108.3        |
| C11-N3-C14                                                                         | 107.7      | 108.1        | C8-C9-C10   | 127.1      | 126.8        |
| N2-C9-C10                                                                          | 124.0      | 124.7        | C14-C15-C16 | 65.5       | 61.9         |
| C9-C10-C11                                                                         | 117.3      | 113.2        | C14-C16-C15 | 57.3       | 59.3         |
| N3-C11-C10                                                                         | 122.6      | 124.0        | N4-C16-C15  | 118.0      | 116.8        |
| C10-C11-C12                                                                        | 126.9      | 126.3        | N4-C16-C14  | 109.1      | 108.4        |
| N3-C11-C12                                                                         | 110.3      | 109.6        | C15-C16-C17 | 128.6      | 126.8        |
| N3-C14-C13                                                                         | 107.5      | 106.6        | C14-C16-C17 | 127.9      | 133.1        |
| C13-C14-C16                                                                        | 127.9      | 131.2        | N4-C16-C17  | 107.5      | 106.3        |
| C13-C14-C15                                                                        | 128.6      | 127.1        | N4-C19-C18  | 110.3      | 110.0        |
| N3-C14-C16                                                                         | 109.1      | 109.3        | C18-C19-C20 | 126.9      | 125.6        |
| N3-C14-C15                                                                         | 118.0      | 117.2        | N4-C19-C20  | 122.6      | 124.3        |
| C15-C14-C16                                                                        | 57.3       | 58.8         | C1-C20-C19  | 117.3      | 114.4        |
| dihedral angles between the $\text{N}_4$ core and the A, B, C, and D pyrrole rings |            |              |             |            |              |
| A                                                                                  | 195.7      | 156.2        | C           | 144.5      | 149.9        |
| B                                                                                  | 184.4      | 156.6        | D           | 156.1      | 152.1        |
