# Supplementary figures and images for: A theoretical analysis of the fundamental stepwise six-electron oxidation of porphyrinogen to porphyrins: the energetics of porphodimethene and artificial porphyrin intermediates †
Source: Royal Society of Chemistry journal article supplement (doi:10.1039/b100044f), 2001-01-01

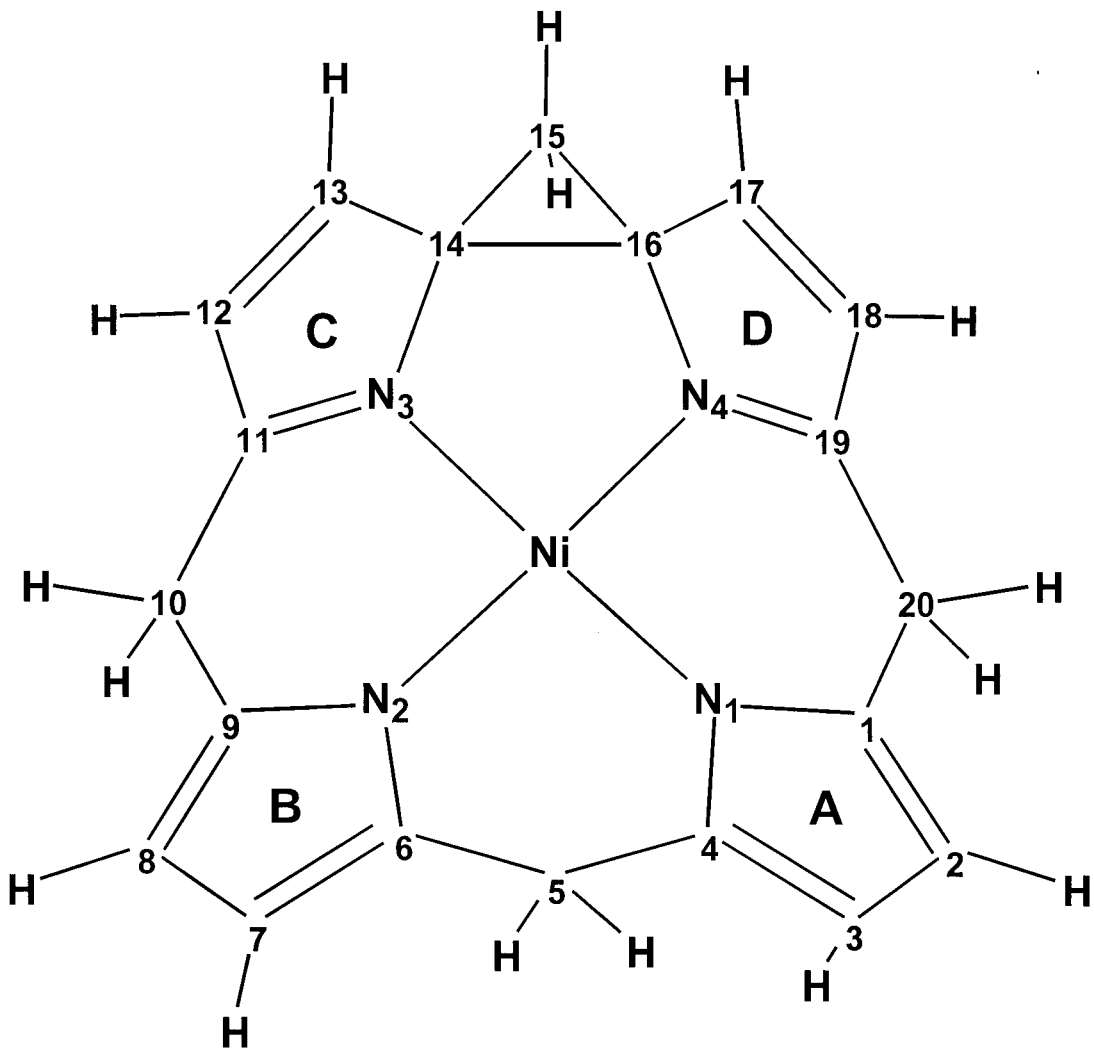

Scheme 1

Supplement: b100044f-s1.pdf [file b100044f-s1.pdf]
